# Supplementary material for: Hamstring extensibility differences among elite adolescent and young dancers of different dance styles and non-dancers
Source: PeerJ. 2020 May 26;8:e9237. doi: 10.7717/peerj.9237 (PMC7258889; doi:10.7717/peerj.9237)
Supplement: Supplemental Information 1 [file peerj-08-9237-s001.xlsx]

## Sheet: Patricia
Code	Age	Dance style (1 Spanish dance; 2 Ballet; 3 contemporary dance; 4: non-dancers)	Academic year	Training hours per week	Days per week	Weight	Height	BMI	Pelvic tilt SR	Pelvic tilt TT	Right PSLR	Left PSLR	Distance SR	Distance TT	Right ASLR	Left ASLR	Clasification of Right PSLR	Clasification of Left PSLR	Clasification of SR	Clasification of TT	Clasification of pelvic tilt SR	Clasification of pelvic tilt TT
1	13.08	1	2	14.5	5	43	154.3	18.0608	8	101	132	109	12	9	113	94	Normal	Normal	Normal	Normal	Normal	Normal
3	13.33	1	3	17	5	47.5	162.5	17.9882	7	99	118	123	15	13.5	108	108	Normal	Normal	Normal	Normal	Normal	Normal
4	13.48	1	3	17	5	51	162	19.433	10	106	116	111	14.5	13.5	86	83	Normal	Normal	Normal	Normal	Normal	Normal
5	14.23	1	2	14.5	5	45	156.7	18.3263	8	81	120	112	9.5	6	102	98	Normal	Normal	Normal	Normal	Normal	Normal
9	14.64	1	3	17	5	47.1	159.2	18.5838	12	101	132	146	11	13	114	97	Normal	Normal	Normal	Normal	Normal	Normal
12	14.68	1	2	14.5	5	50	163.3	18.7498	30	109	129	137	16	16	108	100	Normal	Normal	Normal	Normal	Normal	Normal
13	14.54	1	4	17	5	52	166.5	18.7575	18	106	145	143	15	17	112	108	Normal	Normal	Normal	Normal	Normal	Normal
17	15.92	1	4	17	5	59.2	166.7	21.3035	21	102	138	147	7.8	12	97	92	Normal	Normal	Normal	Normal	Normal	Normal
18	15.66	1	2	14.5	5	58	154.3	24.3611	31	111	140	132	19.5	12	101	103	Normal	Normal	Normal	Normal	Normal	Normal
19	15.56	1	3	17	5	46.1	155.6	19.0406	16	106	146	128	11	13	114	97	Normal	Normal	Normal	Normal	Normal	Normal
20	15.98	1	4	17	5	51.7	160.1	20.1701	20	99	120	126	12.5	15	118	116	Normal	Normal	Normal	Normal	Normal	Normal
21	15.09	1	3	17	5	57.5	169	20.1323	7	102	134	134	17	15.5	92	90	Normal	Normal	Normal	Normal	Normal	Normal
22	15.17	1	3	17	5	52	154.8	21.7001	14	110	141	150	18.5	15.5	98	105	Normal	Normal	Normal	Normal	Normal	Normal
23	15.34	1	2	14.5	5	51.5	153.6	21.8285	28	116	135	135	18	16	95	94	Normal	Normal	Normal	Normal	Normal	Normal
25	15.99	1	2	14.5	5	59	153.1	25.1711	16	105	139	128	19	17	110	90	Normal	Normal	Normal	Normal	Normal	Normal
26	15.44	1	4	17	5	44	157.3	17.7826	19	112	142	144	18	17.5	111	111	Normal	Normal	Normal	Normal	Normal	Normal
27	15.42	1	4	17	5	55.1	162.6	20.8406	22	107	153	148	13	17.6	103	95	Normal	Normal	Normal	Normal	Normal	Normal
28	15.12	1	2	14.5	5	51	158.6	20.2751	5	99	116	106	16	18	88	79	Normal	Normal	Normal	Normal	Normal	Normal
29	15.41	1	5	21	5	58.5	167.2	20.9259	22	104	135	120	18	18	105	102	Normal	Normal	Normal	Normal	Normal	Normal
31	16.86	1	3	17	5	49.1	157.2	19.869	14	95	133	117	3.5	7	113	100	Normal	Normal	Normal	Normal	Normal	Normal
34	16.01	1	2	14.5	5	54	160	21.0937	15	103	117	121	15.5	12	98	87	Normal	Normal	Normal	Normal	Normal	Normal
35	16.64	1	4	17	5	60	172	20.2812	22	99	126	123	18.5	13	101	97	Normal	Normal	Normal	Normal	Normal	Normal
36	16.28	1	4	17	5	50	157.5	20.1562	23	104	123	117	15	14	102	89	Normal	Normal	Normal	Normal	Normal	Normal
37	16.07	1	3	17	5	59	158.3	23.5445	18	110	124	124	16	14	79	82	Normal	Normal	Normal	Normal	Normal	Normal
38	16.42	1	2	14.5	5	70	159	27.6888	28	105	150	131	18	14.5	118	102	Normal	Normal	Normal	Normal	Normal	Normal
39	16.95	1	5	21	5	49	157.7	19.703	19	106	127	130	15.57	15	96	93	Normal	Normal	Normal	Normal	Normal	Normal
40	16.27	1	5	21	5	47.3	157.4	19.092	19	111	130	122	16	15.5	102	106	Normal	Normal	Normal	Normal	Normal	Normal
41	16.51	1	4	17	5	51	161.5	19.5535	25	98	143	116	21	16	101	85	Normal	Normal	Normal	Normal	Normal	Normal
42	16.23	1	4	17	5	59	165	21.6713	13	99	119	126	13	16	104	104	Normal	Normal	Normal	Normal	Normal	Normal
43	16.86	1	5	21	5	50	165.3	18.2989	24	111	113	111	20	16	96	94	Normal	Normal	Normal	Normal	Normal	Normal
44	16.21	1	5	21	5	57.1	161.8	21.8112	19	111	126	110	14	16.5	104	93	Normal	Normal	Normal	Normal	Normal	Normal
46	16.36	1	4	17	5	60	170	20.7612	15	99	140	142	12.3	18	93	98	Normal	Normal	Normal	Normal	Normal	Normal
47	16.25	1	6	21.5	5	58	164	21.5645	19	106	122	121	18	18	102	102	Normal	Normal	Normal	Normal	Normal	Normal
49	16.62	1	3	17	5	48.5	159	19.1844	17	108	141	130	18	18.5	98	87	Normal	Normal	Normal	Normal	Normal	Normal
50	16.17	1	3	17	5	56.5	159.3	22.2647	21	98	130	131	14.5	19	104	96	Normal	Normal	Normal	Normal	Normal	Normal
53	16.61	1	4	17	5	52	162.7	19.6439	30	122	136	134	17.5	20	85	87	Normal	Normal	Normal	Normal	Normal	Normal
55	16.85	1	5	21	5	43	155.5	17.7831	24	111	144	146	22	21	127	121	Normal	Normal	Normal	Normal	Normal	Normal
57	16.11	1	4	17	5	55.9	155.6	23.0883	26	111	145	157	17	23.6	93	113	Normal	Normal	Normal	Normal	Normal	Normal
61	17.38	1	6	21.5	5	45.1	154.7	18.845	29	100	134	130	22.5	11	118	110	Normal	Normal	Normal	Normal	Normal	Normal
62	17.32	1	6	21.5	5	57	156.5	23.2727	13	95	132	137	15	12	92	92	Normal	Normal	Normal	Normal	Normal	Normal
63	17.07	1	6	21.5	5	54	153	23.0681	9	102	134	132	13	13.5	98	93	Normal	Normal	Normal	Normal	Normal	Normal
67	17.8	1	4	17	5	58.7	158.4	23.3953	19	114	136	130	16.7	14.4	93	80	Normal	Normal	Normal	Normal	Normal	Normal
68	17.84	1	5	21	5	63.6	173.1	21.2257	25	101	115	114	8	15	92	89	Normal	Normal	Normal	Normal	Normal	Normal
69	17.24	1	5	21	5	60.4	170	20.8997	8	109	118	122	16.5	15	102	98	Normal	Normal	Normal	Normal	Normal	Normal
70	17.17	1	6	21.5	5	52.2	158.3	20.8309	26	112	123	122	15	15.5	95	98	Normal	Normal	Normal	Normal	Normal	Normal
72	17.83	1	6	21.5	5	59	164	21.9363	23	110	147	133	17	16	121	108	Normal	Normal	Normal	Normal	Normal	Normal
73	17.35	1	2	14.5	5	64	157.2	25.8985	21	107	129	131	19	16.5	98	96	Normal	Normal	Normal	Normal	Normal	Normal
74	17.83	1	4	17	5	56.8	156	23.3399	36	111	133	131	17	17	100	109	Normal	Normal	Normal	Normal	Normal	Normal
75	17.95	1	5	21	5	53.1	161.6	20.3335	22	98	118	107	13	17.5	101	95	Normal	Normal	Normal	Normal	Normal	Normal
76	17.17	1	4	17	5	58	154	24.4561	24	115	130	114	17.5	17.5	107	88	Normal	Normal	Normal	Normal	Normal	Normal
77	17.03	1	4	17	5	52	159	20.5688	20	103	115	109	17	18	94	88	Normal	Normal	Normal	Normal	Normal	Normal
78	17.35	1	4	17	5	45	159.5	17.6885	33	110	136	116	21.5	18	117	95	Normal	Normal	Normal	Normal	Normal	Normal
81	17.3	1	4	17	5	59	176.2	19.0038	8	103	129	125	19	20	106	103	Normal	Normal	Normal	Normal	Normal	Normal
82	17.48	1	6	21.5	5	49	157.8	19.6781	27	106	132	127	17	20	103	106	Normal	Normal	Normal	Normal	Normal	Normal
89	18.26	1	4	17	5	62	168.5	21.8369	9	112	125	131	13	10	99	91	Normal	Normal	Normal	Normal	Normal	Normal
91	18.11	1	4	17	5	54	160.8	20.8844	19	111	115	114	11.5	11.5	89	91	Normal	Normal	Normal	Normal	Normal	Normal
93	18.5	1	6	21.5	5	51	157.4	20.5855	21	108	114	112	11	12	100	92	Normal	Normal	Normal	Normal	Normal	Normal
94	18.82	1	5	21	5	57.5	158.5	22.8881	20	106	112	108	12.5	15	94	91	Normal	Normal	Normal	Normal	Normal	Normal
95	18.15	1	6	21.5	5	61.5	173	20.5486	25	102	114	112	17	17	98	94	Normal	Normal	Normal	Normal	Normal	Normal
96	18.57	1	4	17	5	73.4	159.4	28.8881	38	114	134	127	15.5	18	112	103	Normal	Normal	Normal	Normal	Normal	Normal
99	18.23	1	6	21.5	5	53	161.5	20.3203	26	103	149	132	14	20	109	106	Normal	Normal	Normal	Normal	Normal	Normal
101	19.07	1	6	21.5	5	72.9	175.1	23.7769	15	102	132	117	13	11	89	86	Normal	Normal	Normal	Normal	Normal	Normal
102	19.28	1	6	21.5	5	63	166	22.8625	10	88	142	138	14	11.5	105	87	Normal	Normal	Normal	Normal	Normal	Normal
103	19.38	1	6	21.5	5	53	159.6	20.807	20	93	117	116	13	14	93	92	Normal	Normal	Normal	Normal	Normal	Normal
104	19.12	1	2	14.5	5	46	158.2	18.38	23	102	135	138	17	15	94	96	Normal	Normal	Normal	Normal	Normal	Normal
109	20.89	1	3	17	5	47	157.9	18.851	27	107	116	114	16	19	99	94	Normal	Normal	Normal	Normal	Normal	Normal
112	21.91	1	6	21.5	5	54	156.2	22.1326	28	114	136	130	10.5	10.5	98	92	Normal	Normal	Normal	Normal	Normal	Normal
115	23.96	1	6	21.5	5	56	162.3	21.2594	31	99	112	118	18.5	20	105	109	Normal	Normal	Normal	Normal	Normal	Normal
117	25.34	1	5	21	5	68.4	172.2	23.0669	24	106	137	136	9	15	105	90	Normal	Normal	Normal	Normal	Normal	Normal
118	26.39	1	6	21.5	5	71	172	23.9995	26	99	130	116	12	13	103	90	Normal	Normal	Normal	Normal	Normal	Normal
119	13.36	2	2	14	5	44	153.8	18.6012	21	110	141	142	14	13.5	118	114	Normal	Normal	Normal	Normal	Normal	Normal
123	13.9	2	2	14	5	54	158	21.6311	16	107	134	137	9	12.5	107	109	Normal	Normal	Normal	Normal	Normal	Normal
120	12.76	2	2	14	5	41	155.8	16.8908	28	112	150	146	16	15	134	126	Normal	Normal	Normal	Normal	Normal	Normal
124	14.03	2	3	18	5	54.1	161	20.8711	27	118	192	194	18	20	131	127	Normal	Normal	Normal	Normal	Normal	Normal
127	15.26	2	3	18	5	53	169.7	18.404	29	97	160	140	20	18	133	123	Normal	Normal	Normal	Normal	Normal	Normal
128	14.52	2	2	14	5	60	167	21.5139	19	102	117	126	20	18	107	107	Normal	Normal	Normal	Normal	Normal	Normal
129	14.71	2	3	18	5	46	157	18.662	31	113	146	143	20	18	128	120	Normal	Normal	Normal	Normal	Normal	Normal
131	14.59	2	4	18.5	5	57	163.5	21.3226	30	122	166	159	21	19.5	119	116	Normal	Normal	Normal	Normal	Normal	Normal
132	14.75	2	3	18	5	43.5	153.8	18.3898	29	111	163	159	19	20	133	116	Normal	Normal	Normal	Normal	Normal	Normal
133	15.2	2	2	14	5	62	169	21.7079	24	105	127	134	18	21	118	121	Normal	Normal	Normal	Normal	Normal	Normal
134	14.63	2	2	14	5	50	155	20.8117	30	114	121	118	26	23	102	94	Normal	Normal	Normal	Normal	Normal	Normal
136	16.23	2	3	18	5	55	154.1	23.161	19	93	138	135	13	9	105	102	Normal	Normal	Normal	Normal	Normal	Normal
137	16.27	2	4	18.5	5	44.9	153.3	19.1057	13	101	155	153	17	13.5	114	117	Normal	Normal	Normal	Normal	Normal	Normal
139	16.34	2	4	18.5	5	58	178.2	18.2647	16	104	140	164	17	15	108	116	Normal	Normal	Normal	Normal	Normal	Normal
140	16.38	2	4	18.5	5	47	159.5	18.4747	20	109	176	174	18	15	123	115	Normal	Normal	Normal	Normal	Normal	Normal
141	15.6	2	3	18	5	54.1	159.8	21.1857	23	112	168	163	15.5	15.4	115	104	Normal	Normal	Normal	Normal	Normal	Normal
142	15.91	2	3	18	5	51	160.7	19.7487	22	112	147	143	18	15.5	129	128	Normal	Normal	Normal	Normal	Normal	Normal
143	15.72	2	4	18.5	5	51	166	18.5078	36	117	145	138	23.5	18.5	121	131	Normal	Normal	Normal	Normal	Normal	Normal
144	15.63	2	4	18.5	5	54.6	169	19.117	28	107	150	148	16.5	21.5	129	110	Normal	Normal	Normal	Normal	Normal	Normal
145	15.93	2	3	18	5	43.9	153.2	18.7045	26	115	162	164	20.5	21.5	139	128	Normal	Normal	Normal	Normal	Normal	Normal
146	16.28	2	4	18.5	5	48.8	154.9	20.3384	28	113	164	152	19.5	22	139	125	Normal	Normal	Normal	Normal	Normal	Normal
148	17.35	2	4	18.5	5	47.2	157.8	18.9552	35	118	156	149	17.5	23.5	122	112	Normal	Normal	Normal	Normal	Normal	Normal
149	16.27	2	4	18.5	5	50.4	159.3	19.8609	41	114	160	150	18.5	24	122	124	Normal	Normal	Normal	Normal	Normal	Normal
150	16.08	2	4	18.5	5	60	171	20.5191	38	119	185	160	28.5	25	131	124	Normal	Normal	Normal	Normal	Normal	Normal
151	16.22	2	4	18.5	5	50.9	156.1	20.8887	43	125	162	158	22	25	134	128	Normal	Normal	Normal	Normal	Normal	Normal
153	17.26	2	5	21	5	49	158	19.6283	29	111	128	130	15.3	12.1	100	106	Normal	Normal	Normal	Normal	Normal	Normal
154	17.28	2	5	21	5	52	165.5	18.9849	33	117	136	132	17.8	12.4	120	115	Normal	Normal	Normal	Normal	Normal	Normal
155	17.38	2	4	18.5	5	44	151.5	19.1702	30	112	138	147	15.5	12.5	108	116	Normal	Normal	Normal	Normal	Normal	Normal
157	16.69	2	3	18	5	66	169	23.1084	25	112	150	142	17	16	114	124	Normal	Normal	Normal	Normal	Normal	Normal
158	17.37	2	4	18.5	5	52.2	159.2	20.5961	36	121	160	155	18	16	128	122	Normal	Normal	Normal	Normal	Normal	Normal
159	17.37	2	4	18.5	5	53.3	153.9	22.5035	28	106	143	138	12.5	16.5	120	108	Normal	Normal	Normal	Normal	Normal	Normal
160	16.77	2	5	21	5	51.1	158	20.4695	30	114	158	166	17	16.5	126	116	Normal	Normal	Normal	Normal	Normal	Normal
161	17.19	2	5	21	5	45	161	17.3604	33	116	168	167	18	17.8	148	139	Normal	Normal	Normal	Normal	Normal	Normal
162	16.5	2	5	21	5	55.2	169	19.3271	32	110	157	129	19	19	135	116	Normal	Normal	Normal	Normal	Normal	Normal
163	16.9	2	3	18	5	61.6	169.7	21.3903	26	108	166	167	18	19.5	116	118	Normal	Normal	Normal	Normal	Normal	Normal
164	17.28	2	4	18.5	5	58	164.3	21.4859	23	117	154	147	22	20	124	108	Normal	Normal	Normal	Normal	Normal	Normal
165	16.94	2	5	21	5	55	162.5	20.8284	27	118	148	148	22.5	20.5	123	115	Normal	Normal	Normal	Normal	Normal	Normal
166	17.18	2	5	21	5	49.7	158	19.9087	33	106	162	161	19	21	125	129	Normal	Normal	Normal	Normal	Normal	Normal
167	17.22	2	4	18.5	5	44.2	153.2	18.8324	28	113	151	145	21	21	132	121	Normal	Normal	Normal	Normal	Normal	Normal
168	16.87	2	5	21	5	50	156.6	20.3886	30	114	167	168	22	21.5	135	137	Normal	Normal	Normal	Normal	Normal	Normal
169	17.06	2	5	21	5	58	165	21.3039	39	118	161	145	23.4	21.9	131	103	Normal	Normal	Normal	Normal	Normal	Normal
170	17.15	2	5	21	5	47.4	154.7	19.806	35	112	154	153	20.5	22	139	128	Normal	Normal	Normal	Normal	Normal	Normal
172	16.94	2	4	18.5	5	52.5	161	20.2538	34	108	164	169	16	22.5	140	134	Normal	Normal	Normal	Normal	Normal	Normal
173	17.46	2	5	21	5	53.6	166.8	19.2652	43	104	166	177	7.9	24.8	134	136	Normal	Normal	Normal	Normal	Normal	Normal
174	16.59	2	3	18	5	49	156	20.1348	29	111	157	160	22.8	25	117	118	Normal	Normal	Normal	Normal	Normal	Normal
175	16.9	2	4	18.5	5	53	158.2	21.1769	33	112	156	152	30	26.5	134	120	Normal	Normal	Normal	Normal	Normal	Normal
176	17.55	2	5	21	5	53.6	154.3	22.513	21	102	142	140	15	16	119	116	Normal	Normal	Normal	Normal	Normal	Normal
177	18.4	2	6	21	5	53.6	157.8	21.5254	22	112	142	152	17.5	16	112	120	Normal	Normal	Normal	Normal	Normal	Normal
178	18.5	2	5	21	5	44.3	151	19.429	28	112	140	158	12.5	17	114	112	Normal	Normal	Normal	Normal	Normal	Normal
179	17.97	2	4	18.5	5	70.4	169.7	24.4461	29	112	147	134	16	19	126	132	Normal	Normal	Normal	Normal	Normal	Normal
180	17.73	2	4	18.5	5	66.6	170	23.045	29	113	134	135	19	19	106	108	Normal	Normal	Normal	Normal	Normal	Normal
181	17.96	2	4	18.5	5	60	177.2	19.1084	37	123	184	172	21	19	132	130	Normal	Normal	Normal	Normal	Normal	Normal
182	18.38	2	4	18.5	5	50	159.5	19.6539	46	102	181	179	27	21	132	127	Normal	Normal	Normal	Normal	Normal	Normal
183	18.38	2	3	18	5	40.7	151	17.8501	31	113	163	180	20	21	102	114	Normal	Normal	Normal	Normal	Normal	Normal
184	17.69	2	5	21	5	52	162.3	19.7409	30	114	162	153	19	21	133	128	Normal	Normal	Normal	Normal	Normal	Normal
185	18.4	2	4	18.5	5	52.5	163.5	19.6392	33	114	179	174	24	21	124	122	Normal	Normal	Normal	Normal	Normal	Normal
186	17.87	2	6	21	5	48.5	162.3	18.4122	29	120	205	178	23	23.5	127	121	Normal	Normal	Normal	Normal	Normal	Normal
187	17.93	2	4	18.5	5	49.1	156	20.1759	31	124	149	153	23	26	109	113	Normal	Normal	Normal	Normal	Normal	Normal
189	17.7	2	5	21	5	53.1	159.5	20.8724	40	124	170	174	31	29.8	130	130	Normal	Normal	Normal	Normal	Normal	Normal
190	19.49	2	2	14	5	51	162.8	19.2425	17	104	113	112	15	14	106	95	Normal	Normal	Normal	Normal	Normal	Normal
191	18.89	2	6	21	5	52.3	159	20.6875	19	114	161	141	13	14	106	103	Normal	Normal	Normal	Normal	Normal	Normal
192	19.39	2	6	21	5	44.4	151.3	19.3957	33	115	127	132	14	18	118	120	Normal	Normal	Normal	Normal	Normal	Normal
193	19.19	2	5	21	5	63	164.5	23.2814	31	119	157	153	20.5	21.5	119	106	Normal	Normal	Normal	Normal	Normal	Normal
194	19.27	2	5	21	5	53.1	163.5	19.8636	31	115	172	166	21	24.5	137	139	Normal	Normal	Normal	Normal	Normal	Normal
196	20.09	2	3	18	5	55.3	164.1	20.5356	18	103	150	129	13.5	15.5	105	101	Normal	Normal	Normal	Normal	Normal	Normal
197	20.37	2	5	21	5	59.5	177.7	18.8427	39	128	161	167	18	17.8	148	139	Normal	Normal	Normal	Normal	Normal	Normal
198	20.5	2	6	21	5	60.2	164.7	22.1927	30	118	142	135	21.5	23	117	98	Normal	Normal	Normal	Normal	Normal	Normal
200	20.26	2	5	21	5	49.2	160	19.2187	40	120	166	168	21.8	26.5	130	115	Normal	Normal	Normal	Normal	Normal	Normal
201	20.18	2	6	21	5	51.7	161	19.9452	41	125	198	187	27	28	138	131	Normal	Normal	Normal	Normal	Normal	Normal
202	22.53	2	5	21	5	58.6	168.5	20.6394	22	110	149	133	17.5	16	118	112	Normal	Normal	Normal	Normal	Normal	Normal
203	12.56	3	2	14	5	42	158	16.8242	7	95	98	97	14.5	14	87	83	Normal	Normal	Normal	Normal	Normal	Normal
204	13.12	3	3	17	5	66	167.3	23.5804	21	110	137	117	19	16	116	110	Normal	Normal	Normal	Normal	Normal	Normal
205	13.16	3	2	14	5	48	157.5	19.35	4	92	97	109	12		76	78	Normal	Normal	Normal	Normal	Normal	Normal
206	14.36	3	3	17	5	42.5	155.6	17.5537	14	100	122	114	18	15	107	102	Normal	Normal	Normal	Normal	Normal	Normal
207	14.62	3	3	17	5	57.5	161.7	21.9911	18	101	122	126	15	16.5	89	93	Normal	Normal	Normal	Normal	Normal	Normal
208	14.03	3	3	17	5	68	170.1	23.5018	19	105	131	127	17.5	17	120	112	Normal	Normal	Normal	Normal	Normal	Normal
209	14.94	3	3	17	5	47	165.1	17.2426	18	103	130	125	18.5	19	99	96	Normal	Normal	Normal	Normal	Normal	Normal
210	14.33	3	2	14	5	43	153.3	18.2972	22	111	153	139	22.5	23.5	124	103	Normal	Normal	Normal	Normal	Normal	Normal
211	15.84	3	3	17	5	62	171	21.2031	-9	77	104	138	3	5	80	96	Normal	Normal	Normal	Normal	Normal	Normal
212	15.28	3	2	14	5	60	172	20.2812	15	98	103	104	9	9	73	82	Normal	Normal	Normal	Normal	Normal	Normal
213	15.64	3	2	14	5	57	171	19.4932	13	103	103	123	12	13	77	89	Normal	Normal	Normal	Normal	Normal	Normal
214	15.92	3	3	17	5	46	146.9	21.3164	25	95	139	135	18	14	119	116	Normal	Normal	Normal	Normal	Normal	Normal
215	15.22	3	2	14	5	57	164	21.1927	13	100	117	112	19.5	15.5	112	101	Normal	Normal	Normal	Normal	Normal	Normal
216	15.2	3	4	17	5	49.2	164	18.2927	19	100	120	111	17	18	100	96	Normal	Normal	Normal	Normal	Normal	Normal
217	15.88	3	4	17	5	68.1	167.1	24.389	26	115	150	157	21	19.5	112	111	Normal	Normal	Normal	Normal	Normal	Normal
218	15.71	3	4	17	5	62.7	170	21.6955	24	116	164	164	19.8	20.8	116	116	Normal	Normal	Normal	Normal	Normal	Normal
219	15.46	3	3	17	5	51	155.1	21.2005	32	111	134	134	23	21	115	114	Normal	Normal	Normal	Normal	Normal	Normal
220	15.53	3	4	17	5	46	149	20.7198	33	114	147	144	26	21	131	124	Normal	Normal	Normal	Normal	Normal	Normal
221	15.25	3	4	17	5	47.8	159	18.9075	24	120	170	168	21.2	21	120	110	Normal	Normal	Normal	Normal	Normal	Normal
222	16.91	3	3	17	5	49	151.1	21.4618	23	104	120	103	11.5	8.5	100	87	Normal	Normal	Normal	Normal	Normal	Normal
223	16.82	3	4	17	5	62.5	170.7	21.4493	5	88	90	133	10.5	10	80	98	Normal	Normal	Normal	Normal	Normal	Normal
224	16.4	3	2	14	5	56	161	21.6041	12	94	95	82	12	10.5	120	100	Normal	Normal	Normal	Normal	Normal	Normal
225	16.77	3	6	22	5	60	167.8	21.3092	20	109	119	120	14.5	12.1	91	86	Normal	Normal	Normal	Normal	Normal	Normal
226	16.22	3	3	17	5	64.5	173.9	21.3285	22	110	140	123	14.5	15	82	83	Normal	Normal	Normal	Normal	Normal	Normal
227	16.98	3	5	21.5	5	58	161	22.3757	26	114	142	113	17	16	138	104	Normal	Normal	Normal	Normal	Normal	Normal
228	16.31	3	5	21.5	5	72.5	167.6	25.8101	33	105	126	127	16.5	20	107	112	Normal	Normal	Normal	Normal	Normal	Normal
229	16.28	3	5	21.5	5	44.7	150	19.8667	33	116	148	137	24	21	127	118	Normal	Normal	Normal	Normal	Normal	Normal
230	16.15	3	5	21.5	5	65.2	170	22.5606	28	117	154	149	16	22	130	128	Normal	Normal	Normal	Normal	Normal	Normal
231	16.47	3	3	17	5	60	165.4	21.9321	23	112	160	147	20	23	108	100	Normal	Normal	Normal	Normal	Normal	Normal
232	16.42	3	4	17	5	55	155.8	22.6583	36	116	153	149	18	23	122	106	Normal	Normal	Normal	Normal	Normal	Normal
233	16.86	3	4	17	5	45.5	154.6	19.0367	28	112	190	172	23.5	24	142	125	Normal	Normal	Normal	Normal	Normal	Normal
234	16.83	3	5	21.5	5	49.1	159.5	19.3001	26	121	147	148	23.5	24	119	120	Normal	Normal	Normal	Normal	Normal	Normal
235	17.21	3	6	22	5	55	167.3	19.6504	9	99	147	113	10.2	9.5	111	94	Normal	Normal	Normal	Normal	Normal	Normal
236	17.02	3	4	17	5	66.7	173	22.2861	14	103	129	118	12	14	86	85	Normal	Normal	Normal	Normal	Normal	Normal
237	17.51	3	4	17	5	47.8	151.8	20.7436	26	112	144	133	10.5	14	103	93	Normal	Normal	Normal	Normal	Normal	Normal
238	17.09	3	6	22	5	56	161	21.6041	33	119	128	125	22.5	17	105	103	Normal	Normal	Normal	Normal	Normal	Normal
239	17.06	3	4	17	5	47	147.3	21.6617	28	123	176	169	13.5	17	122	123	Normal	Normal	Normal	Normal	Normal	Normal
240	17.22	3	6	22	5	55.5	161.8	21.2	33	114	124	140	18	17.5	120	115	Normal	Normal	Normal	Normal	Normal	Normal
241	17.4	3	5	21.5	5	47	158.5	18.7085	35	110	144	146	23.5	18	119	124	Normal	Normal	Normal	Normal	Normal	Normal
242	17.92	3	4	17	5	59.5	165.6	21.6968	31	111	130	119	19.5	22	107	105	Normal	Normal	Normal	Normal	Normal	Normal
243	17.29	3	2	14	5	43	149.5	19.2392	15	110	139	143	23.5	22.5	99	100	Normal	Normal	Normal	Normal	Normal	Normal
244	17.06	3	6	22	5	56.7	162.3	21.5251	34	117	133	138	22.5	24	116	108	Normal	Normal	Normal	Normal	Normal	Normal
245	17.74	3	5	21.5	5	57.5	156	23.6275	31	122	137	132	21.5	25	120	104	Normal	Normal	Normal	Normal	Normal	Normal
246	17.78	3	6	22	5	46.3	148	21.1377	35	130	145	135	23	26	132	131	Normal	Normal	Normal	Normal	Normal	Normal
247	18.63	3	5	21.5	5	51	164.4	18.8698	25	107	141	128	20.5	9.5	118	106	Normal	Normal	Normal	Normal	Normal	Normal
248	18.03	3	6	22	5	59.2	161.5	22.6974	26	103	148	128	9	15	132	112	Normal	Normal	Normal	Normal	Normal	Normal
249	18.48	3	5	21.5	5	48.6		#DIV/0!	32	108	125	115	11	16	104	97	Normal	Normal	Normal	Normal	Normal	Normal
250	18.27	3	6	22	5	59	169	20.6575	29	110	121	120	22.5	16.5	93	86	Normal	Normal	Normal	Normal	Normal	Normal
251	18.03	3	3	17	5	68	169.8	23.5849	37	123	147	146	19	17	126	120	Normal	Normal	Normal	Normal	Normal	Normal
252	18.73	3	6	22	5	59	165.5	21.5405	42	119	168	158	28.2	20.5	128	130	Normal	Normal	Normal	Normal	Normal	Normal
253	18.44	3	6	22	5	48	153.1	20.4782	34	116	149	133	20.5	21.8	113	102	Normal	Normal	Normal	Normal	Normal	Normal
254	18.94	3	6	22	5	42.7	159	16.8902	42	114	148	135	12.5	22	115	112	Normal	Normal	Normal	Normal	Normal	Normal
255	18.25	3	6	22	5	48.1	158.6	19.1222	36	119	158	162	20.5	22	128	127	Normal	Normal	Normal	Normal	Normal	Normal
256	18.03	3	5	21.5	5	49.1	146.5	22.8774	27	123	142	159	16	22	127	128	Normal	Normal	Normal	Normal	Normal	Normal
257	18.97	3	6	22	5	62	165.2	22.7181	22	94	124	130	26	24	108	114	Normal	Normal	Normal	Normal	Normal	Normal
258	19.02	3	6	22	5	55	162.5	20.8284	32	111	144	122	22.5	18	104	94	Normal	Normal	Normal	Normal	Normal	Normal
259	19.88	3	6	22	5	60	173.5	19.9321	27	121	123	120	18	18	116	97	Normal	Normal	Normal	Normal	Normal	Normal
260	19.22	3	4	17	5	54	160	21.0937	33	111	130	131	21.5	18.5	105	111	Normal	Normal	Normal	Normal	Normal	Normal
261	19.23	3	4	17	5	65.4	171	22.3659	36	115	155	146	19	21	126	123	Normal	Normal	Normal	Normal	Normal	Normal
262	19.17	3	6	22	5	54	165	19.8347	29	109	164	167	15	22	142	137	Normal	Normal	Normal	Normal	Normal	Normal
263	19.97	3	6	22	5	53.6	162.7	20.2484	32	118	154	156	22	22	130	126	Normal	Normal	Normal	Normal	Normal	Normal
264	19.27	3	6	22	5	64.2	165	23.5813	24	104	130	142	20	23	108	126	Normal	Normal	Normal	Normal	Normal	Normal
265	20.9	3	6	22	5	47	155	19.563	16	105	129	126	16.5	13.5	106	109	Normal	Normal	Normal	Normal	Normal	Normal
266	20.93	3	6	22	5	52	156.4	21.2584	27	110	138	127	23	17	113	99	Normal	Normal	Normal	Normal	Normal	Normal
267	20.35	3	5	21.5	5	57.4	160.2	22.3659	35	115	134	142	22.5	18	96	112	Normal	Normal	Normal	Normal	Normal	Normal
268	20.77	3	6	22	5	56.5	155	23.5172	18	98	127	119	18	20	97	91	Normal	Normal	Normal	Normal	Normal	Normal
269	21.47	3	3	17	5	55	161.5	21.0871	-3	86	109	118	8.5	10	100	98	Normal	Normal	Normal	Normal	Normal	Normal
270	21.19	3	4	17	5	54	168	19.1327	35	116	129	128	24.5	21	110	107	Normal	Normal	Normal	Normal	Normal	Normal
271	21.04	3	6	22	5	60.5	161.7	23.1385	37	120	126	125	24	24	103	109	Normal	Normal	Normal	Normal	Normal	Normal
272	24.26	3	4	17	5	53.4	151.1	23.389	21	102	162	156	11.5	18.5	119	121	Normal	Normal	Normal	Normal	Normal	Normal
273	16.32	4				44.5	161	17.1675	-25	63	96	84	-13	-16	86	75	Normal	Normal	Shortness grade II	Shortness grade II	Shortness grade I	Shortness
274	16.92	4				67.7	172	22.884	-21	74	88	95	-9	-16	74	69	Normal	Normal	Shortness grade I	Shortness grade II	Shortness grade I	Normal
275	16.25	4				51.4	162	19.5854	-16	64	92	84	-11.5	-15.5	80	72	Normal	Normal	Shortness grade II	Shortness grade II	Normal	Shortness
276	16.45	4				48.2	152.5	20.7256	-12	63	87	95	-9	-15	86	86	Normal	Normal	Shortness grade I	Shortness grade II	Normal	Shortness
277	16.38	4				61.8	169	21.6379	-18	56	83	93	-11	-14	65	79	Normal	Normal	Shortness grade II	Shortness grade II	Normal	Shortness
279	16.85	4				58.3	166	21.1569	-7	67	77	89	-8	-13	56	58	Normal	Normal	Shortness grade I	Shortness grade II	Normal	Normal
280	16.98	4				62.4	174	20.6104	-8	47	73	85	-10	-12	62	78	Shortness grade I	Normal	Shortness grade II	Shortness grade II	Normal	Shortness
282	16.52	4				49.1	167	17.6055	-3	67	85	100	-8	-9	63	76	Normal	Normal	Shortness grade I	Shortness grade I	Normal	Normal
283	16.72	4				51.5	154	21.7153	-5	77	70	80	-6	-8	63	66	Shortness grade I	Normal	Shortness grade I	Shortness grade I	Normal	Normal
284	16.48	4				41.7	156	17.1351	-2	62	80	90	1	-6	64	70	Normal	Normal	Normal	Shortness grade I	Normal	Shortness
285	16.78	4				44.4	154	18.7215	-17	71	87	91	-8	-6	63	78	Normal	Normal	Shortness grade I	Shortness grade I	Normal	Normal
287	16.68	4				54.7	167	19.6135	-12	77	100	101	-6	-4	80	71	Normal	Normal	Shortness grade I	Normal	Normal	Normal
288	16.55	4				51.1	165	18.7695	-14	73	97	97	-9	-3	84	80	Normal	Normal	Shortness grade I	Normal	Normal	Normal
289	16.49	4				79.8	153	34.0895	2	76	73	77	-5	-3	62	56	Shortness grade I	Normal	Shortness grade I	Normal	Normal	Normal
290	16.59	4				50	166	18.1449	-20	69	82	96	-5	-2	58	62	Normal	Normal	Shortness grade I	Normal	Shortness grade I	Normal
291	16.87	4				49.7	159.5	19.536	-11	76	88	79	-3	1	77	66	Normal	Normal	Shortness grade I	Normal	Normal	Normal
292	16.81	4				48.6	162	18.5185	-7	77	78	82	-3	3	74	68	Normal	Normal	Shortness grade I	Normal	Normal	Normal
294	16.41	4				69	160	26.9531	5	93	92	97	6	5	89	78	Normal	Normal	Normal	Normal	Normal	Normal
296	16.63	4				51.7	154	21.7996	3	74	84	96	9	6	66	74	Normal	Normal	Normal	Normal	Normal	Normal
297	16.1	4				54.9	165	20.1653	-2	86	78	93	3	6	58	75	Normal	Normal	Normal	Normal	Normal	Normal
298	16.77	4				47.6	155	19.8127	-6	88	82	100	-2	6	79	87	Normal	Normal	Normal	Normal	Normal	Normal
305	17.53	4				56.3	160	21.9922	-16	54	88	86	-13	-19	76	74	Normal	Normal	Shortness grade II	Shortness grade II	Normal	Shortness
308	17.24	4				58.3	167	20.9043	-28	61	88	91	-14	-16	78	78	Normal	Normal	Shortness grade II	Shortness grade II	Shortness grade II	Shortness
309	17.83	4				45.6	158.4	18.1742	-16	60	98	94	-9	-15	90	79	Normal	Normal	Shortness grade I	Shortness grade II	Normal	Shortness
311	17.84	4				57.6	155	23.975	-8	64	95	92	-12.5	-14	84	81	Normal	Normal	Shortness grade II	Shortness grade II	Normal	Shortness
312	17.48	4				65	171	22.2291	-4	67	85	80	-5	-13	60	70	Normal	Normal	Shortness grade I	Shortness grade II	Normal	Normal
313	17.07	4				44.9	155.7	18.5212	-18	47	87	86	-6	-12	64	67	Normal	Normal	Shortness grade I	Shortness grade II	Normal	Shortness
314	17.49	4				43.6	155.6	18.0081	-18	59	79	73	-10	-11	51	58	Normal	Shortness grade I	Shortness grade II	Shortness grade I	Normal	Shortness
315	17.19	4				47.6	158.3	18.9953	-10	74	101	91	-8	-10.5	89	80	Normal	Normal	Shortness grade I	Shortness grade I	Normal	Normal
316	17.56	4				60.7	156	24.9425	-9	62	98	82	-13	-10	66	67	Normal	Normal	Shortness grade II	Shortness grade I	Normal	Shortness
318	17.13	4				49.8	155	20.7284	-15	71	82	88	-5	-7	68	74	Normal	Normal	Shortness grade I	Shortness grade I	Normal	Normal
319	17.56	4				57	169	19.9573	-10	74	84	89	-9	-6	67	63	Normal	Normal	Shortness grade I	Shortness grade I	Normal	Normal
321	17.88	4				56.2	161	21.6813	-19	69	84	71	-3	-5	64	54	Normal	Shortness grade I	Shortness grade I	Shortness grade I	Normal	Normal
322	17.85	4				49.5	171	16.9283	-6	75	82	81	-7	-4	64	63	Normal	Normal	Shortness grade I	Normal	Normal	Normal
324	17.43	4				53.9	158	21.5911	-6	67	104	84	-2	-2	79	74	Normal	Normal	Normal	Normal	Normal	Normal
325	17.61	4				47.6	158	19.0675	-14	70	103	111	0	-2	87	86	Normal	Normal	Normal	Normal	Normal	Normal
326	17.75	4				50.2	164	18.6645	-10	75	80	77	-3	-2	60	53	Normal	Normal	Shortness grade I	Normal	Normal	Normal
327	17.74	4				44.7	163	16.8241	3	67	80	83	1	0	73	75	Normal	Normal	Normal	Normal	Normal	Normal
329	17.9	4				48.7	154.8	20.323	3	79	91	86	3	2	67	65	Normal	Normal	Normal	Normal	Normal	Normal
330	17.75	4				53	163	19.9481	6	85	90	86	5	2	67	72	Normal	Normal	Normal	Normal	Normal	Normal
331	17.79	4				68.8	161	26.5422	6	81	120	108	14	7	90	93	Normal	Normal	Normal	Normal	Normal	Normal
339	16.22	4				74.4	156	30.572	-8	66	78	80	-20	-16	63	66	Normal	Normal	Shortness grade II	Shortness grade II	Normal	Normal
340	16.61	4				52.2	158.7	20.7261	-23	53	83	88	-13.5	-15.5	69	75	Normal	Normal	Shortness grade II	Shortness grade II	Shortness grade I	Shortness
342	16.32	4				49.9	162	19.0139	-9	71	84	98	-13	-13	65	74	Normal	Normal	Shortness grade II	Shortness grade II	Normal	Normal
343	16.7	4				75	154	31.6242	5	69	75	75	-18	-11	68	70	Normal	Normal	Shortness grade II	Shortness grade I	Normal	Normal
345	16.1	4				42.5	159.3	16.7478	-4	71	87	91	-2	-3	75	74	Normal	Normal	Normal	Normal	Normal	Normal
347	16.34	4				71.7	158.6	28.5045	4	90	93	100	6	2	89	94	Normal	Normal	Normal	Normal	Normal	Normal
348	16.34	4				60	159.2	23.6736	10	80	100	103	10	7	90	90	Normal	Normal	Normal	Normal	Normal	Normal
352	17.29	4				57.1	157.3	23.077	-19	53	88	78	-16	-18	60	70	Normal	Normal	Shortness grade II	Shortness grade II	Normal	Shortness
354	17.01	4				43.7	158.4	17.4169	-12	56	84	76	-11	-16	67	64	Normal	Normal	Shortness grade II	Shortness grade II	Normal	Shortness
357	17.06	4				68.8	160.1	26.8414	-4	61	77	80	-14	-13	63	70	Normal	Normal	Shortness grade II	Shortness grade II	Normal	Shortness
358	17.42	4				54.9	159.4	21.6071	-9	79	88	80	-1	-9.5	66	62	Normal	Normal	Normal	Shortness grade I	Normal	Normal
359	17.24	4				49.2	159	19.4613	0	83	100	105	-3	-6	82	85	Normal	Normal	Shortness grade I	Shortness grade I	Normal	Normal
360	17.51	4				46.2	155.5	19.1065	-5	73	75	86	-11	-5	70	70	Normal	Normal	Shortness grade II	Shortness grade I	Normal	Normal
361	17.41	4				50.9	155	21.1863	1	71	91	90	-6	1	80	87	Normal	Normal	Shortness grade I	Normal	Normal	Normal
363	17.87	4				41.8	158.5	16.6386	-5	84	92	85	5	4	78	81	Normal	Normal	Normal	Normal	Normal	Normal
364	18.27	4				44	161.6	16.8488	-28	41	87	92	-28	-28	69	66	Normal	Normal	Shortness grade II	Shortness grade II	Shortness grade II	Shortness
365	18.34	4				42.2	159	16.6924	-23	47	76	65	-17	-20	65	64	Normal	Shortness grade I	Shortness grade II	Shortness grade II	Shortness grade I	Shortness
366	18.01	4				54.3	159.3	21.3978	-7	58	98	102	-10	-16	90	93	Normal	Normal	Shortness grade II	Shortness grade II	Normal	Shortness
368	18.03	4				60.5	156.4	24.7333	-1	81	95	116	-8	-11	94	92	Normal	Normal	Shortness grade I	Shortness grade I	Normal	Normal
369	18.99	4				43.1	161.6	16.5042	-21	62	80	88	-11	-10	64	72	Normal	Normal	Shortness grade II	Shortness grade I	Shortness grade I	Shortness
370	18.22	4				40.1	156.9	16.2892	-2	67	92	91	-7.5	-10	88	83	Normal	Normal	Shortness grade I	Shortness grade I	Normal	Normal
372	18.42	4				52.2	155	21.7274	-6	63	75	85	-2	-3	62	73	Normal	Normal	Normal	Normal	Normal	Shortness
373	18	4				59.6	159.6	23.3981	0	68	80	90	-6	1	56	66	Normal	Normal	Shortness grade I	Normal	Normal	Normal
378	19.31	4				65.2	155.6	26.9295	-14	58	100	95	-16	-19	79	81	Normal	Normal	Shortness grade II	Shortness grade II	Normal	Shortness
380	19.95	4				86.6	154.3	36.3736	4	65	94	81	-11	-11	85	71	Normal	Normal	Shortness grade II	Shortness grade I	Normal	Normal
381	19.74	4				58.3	160.1	22.745	-8	70	91	101	-1	-9	78	76	Normal	Normal	Normal	Shortness grade I	Normal	Normal
382	19.53	4				49.3	155.6	20.3623	-2	73	98	103	-7	-9	87	83	Normal	Normal	Shortness grade I	Shortness grade I	Normal	Normal
386	20.46	4				45.3	160.3	17.6291	-11	59	85	83	-6	-8	60	60	Normal	Normal	Shortness grade I	Shortness grade I	Normal	Shortness
387	20.68	4				46	159	18.1955	-3	82	92	94	-8	-5	81	74	Normal	Normal	Shortness grade I	Shortness grade I	Normal	Normal
